# Supplementary material
Source: publisher figshare collection journal article supplement (https://acs.figshare.com/ndownloader/files/4472233)
Supplement: Supplementary file 1 [file 4472233]

### **Supporting Information of Zheng et al**

Videos of de-focus fluorescence microscopy of fluorophores chemically attached to polystyrene chain ends at temperature of 40°C (Movie 1) and 44°C (Movie 2). The size of the images is  $50.6 \times 50.6 \mu\text{m}$ . The image capture frequency is 0.2 Hz and the exposure time of Movie 1 and 2 is 1.0 s and 0.5 s, respectively.
